# Supplementary material
Source: PubMed Central journal article supplement (PMC10026800)
Supplement: 41583_2023_684_MOESM1_ESM.pdf [file 41583_2023_684_MOESM1_ESM.pdf]

# Shaping the brain vasculature in development and disease in the single-cell era

In the format provided by the authors and unedited

|                                                                         | <b>Sprouting angiogenesis</b>                                                                                                                                                                                                                                                                                               | <b>Vasculogenesis</b>                                                         | <b>Intussusception</b>  | <b>Vessel co-option</b>                                                                                                                                                                                                             | <b>Vascular mimicry</b>                                                                                                                                  | <b>Stem cell to EC/PVC /vSMC transdifferentiation</b>                                                                                                               |
|-------------------------------------------------------------------------|-----------------------------------------------------------------------------------------------------------------------------------------------------------------------------------------------------------------------------------------------------------------------------------------------------------------------------|-------------------------------------------------------------------------------|-------------------------|-------------------------------------------------------------------------------------------------------------------------------------------------------------------------------------------------------------------------------------|----------------------------------------------------------------------------------------------------------------------------------------------------------|---------------------------------------------------------------------------------------------------------------------------------------------------------------------|
| <b>Modes of neovascularization during brain development</b>             |                                                                                                                                                                                                                                                                                                                             |                                                                               |                         |                                                                                                                                                                                                                                     |                                                                                                                                                          |                                                                                                                                                                     |
| Embryological brain development                                         | Yes, VEGF-A <sup>1</sup> , Ang-1 <sup>2</sup> , Integrin $\beta_8$ and $\alpha_v^3$ , Wnt7a-b/ $\beta$ -Catenin <sup>4</sup> , TGF- $\beta^5$ , PPIL4/JMJD6/Wnt <sup>6</sup>                                                                                                                                                | Yes, PNVP formation, VEGF-A <sup>1</sup>                                      | ?                       | ?                                                                                                                                                                                                                                   | ?                                                                                                                                                        | ?                                                                                                                                                                   |
| Postnatal brain development                                             | Yes, VEGF-A <sup>7,8</sup> , Nogo-A <sup>9</sup> , Semaphorin-3A/3E-Plexin D1 <sup>10,11</sup> , Slit2-Robo <sup>4,12,13</sup>                                                                                                                                                                                              | Yes, VEGF-A <sup>14</sup>                                                     | ?                       | ?                                                                                                                                                                                                                                   | ?                                                                                                                                                        | ?                                                                                                                                                                   |
| <b>Modes of neovascularization in glial brain tumors</b>                |                                                                                                                                                                                                                                                                                                                             |                                                                               |                         |                                                                                                                                                                                                                                     |                                                                                                                                                          |                                                                                                                                                                     |
| Primary glial brain tumors                                              | Yes, VEGF, Dll4/Notch <sup>15</sup> , PGC-1 $\alpha$ <sup>16</sup> , Ephrin B2 <sup>17</sup> , CXCR4/SDF1 $\alpha$ <sup>18</sup> , Integrin $\alpha_3\beta_1$ and $\alpha_v\beta_3$ <sup>3,19,20</sup>                                                                                                                      | Yes, BMDCs (EPCs express CXCR4 <sup>21,22</sup> , ANG-2/TIE-2 <sup>23</sup> ) | Yes, VEGF <sup>24</sup> | Yes, ANG-2/Tie-2 <sup>25,26</sup> , VEGF <sup>25</sup> , Bradykinin <sup>27</sup> , CXCR4/SDF1 $\alpha$ <sup>28,29</sup> , EGFRvIII <sup>30</sup> , MDGI/FA BP3 <sup>31,32</sup> , Olig2/Wnt 7a <sup>33</sup> , CDC42 <sup>34</sup> | Yes <sup>35-37</sup> , IGFB2 <sup>38</sup> , LRIG1/E GFR <sup>39</sup> , MMP2/MMP14/PI3K-ERK <sup>40,41</sup> , ZRANB2 <sup>42</sup> , ObR <sup>43</sup> | Yes, GSC to EC (Notch and TGF $\beta$ pathways) <sup>44-48</sup> , GSC to pericyte (Notch1) <sup>49,50</sup> , and GSC to vSMC phenotype (BMP4/S MAD) <sup>51</sup> |
| <b>Modes of neovascularization in brain arteriovenous malformations</b> |                                                                                                                                                                                                                                                                                                                             |                                                                               |                         |                                                                                                                                                                                                                                     |                                                                                                                                                          |                                                                                                                                                                     |
| Sporadic brain AVM                                                      | Yes, ALK1 <sup>52</sup> , ENG <sup>52</sup> , ITGB8 <sup>53,54</sup> , IL1B <sup>55</sup> , GNAQ <sup>56-58</sup> , EPHB4 <sup>59</sup> , ANGPTL4 <sup>60</sup> , VEGF <sup>61</sup> , MMP3 <sup>62</sup> , MMP9 <sup>63</sup> , Sox17 <sup>60</sup> , RBBP8 <sup>60</sup> , CDKN2a/b <sup>64</sup> , KRAS <sup>65-67</sup> | Yes, CD133, SDF-1a, and CD68-positive cells (EPCs) in nidus <sup>68</sup>     | ?                       | ?                                                                                                                                                                                                                                   | ?                                                                                                                                                        | ?                                                                                                                                                                   |
| Hereditary brain AVM                                                    | Yes, ENG <sup>69-71</sup> (HHT type I), ALK1 <sup>72,73</sup> (HHT type II), TGF $\beta$ /SMAD pathway,                                                                                                                                                                                                                     | Yes, CD133, SDF-1a, and CD68-positive cells in nidus (EPCs) <sup>68</sup>     | ?                       | ?                                                                                                                                                                                                                                   | ?                                                                                                                                                        | ?                                                                                                                                                                   |

|  |                        |  |  |  |  |
|--|------------------------|--|--|--|--|
|  | RASA1 <sup>74,75</sup> |  |  |  |  |
|--|------------------------|--|--|--|--|

Table 1. Modes of neovascularization during brain development, in glial brain tumors and in brain AVMs.

## REFERENCES

- 1 Hogan, K. A., Ambler, C. A., Chapman, D. L. & Bautch, V. L. The neural tube patterns vessels developmentally using the VEGF signaling pathway. *Development* **131**, 1503-1513, doi:10.1242/dev.01039 (2004).
- 2 Suri, C. *et al.* Requisite role of angiopoietin-1, a ligand for the TIE2 receptor, during embryonic angiogenesis. *Cell* **87**, 1171-1180, doi:10.1016/s0092-8674(00)81813-9 (1996).
- 3 McCarty, J. H. *et al.* Selective ablation of alphav integrins in the central nervous system leads to cerebral hemorrhage, seizures, axonal degeneration and premature death. *Development* **132**, 165-176, doi:10.1242/dev.01551 (2005).
- 4 Stenman, J. M. *et al.* Canonical Wnt signaling regulates organ-specific assembly and differentiation of CNS vasculature. *Science* **322**, 1247-1250, doi:10.1126/science.1164594 (2008).
- 5 Mu, Z., Yang, Z., Yu, D., Zhao, Z. & Munger, J. S. TGFbeta1 and TGFbeta3 are partially redundant effectors in brain vascular morphogenesis. *Mech Dev* **125**, 508-516, doi:10.1016/j.mod.2008.01.003 (2008).
- 6 Barak, T. *et al.* PPIL4 is essential for brain angiogenesis and implicated in intracranial aneurysms in humans. *Nat Med* **27**, 2165-2175, doi:10.1038/s41591-021-01572-7 (2021).
- 7 Ogunshola, O. O. *et al.* Neuronal VEGF expression correlates with angiogenesis in postnatal developing rat brain. *Brain Res Dev Brain Res* **119**, 139-153 (2000).
- 8 Ment, L. R. *et al.* Vascular endothelial growth factor mediates reactive angiogenesis in the postnatal developing brain. *Brain Res Dev Brain Res* **100**, 52-61, doi:10.1016/s0165-3806(97)00012-6 (1997).
- 9 Walchli, T. *et al.* Nogo-A is a negative regulator of CNS angiogenesis. *Proc Natl Acad Sci U S A* **110**, E1943-1952, doi:10.1073/pnas.1216203110 (2013).
- 10 Fukushima, Y. *et al.* Sema3E-PlexinD1 signaling selectively suppresses disoriented angiogenesis in ischemic retinopathy in mice. *J Clin Invest* **121**, 1974-1985, doi:10.1172/JCI44900 (2011).
- 11 Serini, G. *et al.* Class 3 semaphorins control vascular morphogenesis by inhibiting integrin function. *Nature* **424**, 391-397, doi:10.1038/nature01784 (2003).
- 12 Jones, C. A. *et al.* Robo4 stabilizes the vascular network by inhibiting pathologic angiogenesis and endothelial hyperpermeability. *Nat Med* **14**, 448-453, doi:10.1038/nm1742 (2008).
- 13 Jones, C. A. *et al.* Slit2-Robo4 signalling promotes vascular stability by blocking Arf6 activity. *Nat Cell Biol* **11**, 1325-1331, doi:10.1038/ncb1976 (2009).
- 14 Ribatti, D., Vacca, A., Nico, B., Roncali, L. & Dammacco, F. Postnatal vasculogenesis. *Mech Dev* **100**, 157-163, doi:https://doi.org/10.1016/S0925-4773(00)00522-0 (2001).
- 15 Hellstrom, M., Phng, L. K. & Gerhardt, H. VEGF and Notch signaling: the yin and yang of angiogenic sprouting. *Cell Adh Migr* **1**, 133-136 (2007).
- 16 Arany, Z. *et al.* HIF-independent regulation of VEGF and angiogenesis by the transcriptional coactivator PGC-1alpha. *Nature* **451**, 1008-1012, doi:10.1038/nature06613 (2008).
- 17 Sawamiphak, S. *et al.* Ephrin-B2 regulates VEGFR2 function in developmental and tumour angiogenesis. *Nature* **465**, 487-491, doi:10.1038/nature08995 (2010).
- 18 Zagzag, D. *et al.* Hypoxia-inducible factor 1 and VEGF upregulate CXCR4 in glioblastoma: implications for angiogenesis and glioma cell invasion. *Lab Invest* **86**, 1221-1232, doi:10.1038/labinvest.3700482 (2006).

- 19 Proctor, J. M., Zang, K., Wang, D., Wang, R. & Reichardt, L. F. Vascular development of the brain requires beta8 integrin expression in the neuroepithelium. *The Journal of neuroscience : the official journal of the Society for Neuroscience* **25**, 9940-9948, doi:10.1523/JNEUROSCI.3467-05.2005 (2005).
- 20 Gladson, C. L. & Cheresh, D. A. Glioblastoma expression of vitronectin and the alpha v beta 3 integrin. Adhesion mechanism for transformed glial cells. *J Clin Invest* **88**, 1924-1932, doi:10.1172/jci115516 (1991).
- 21 Tabatabai, G., Frank, B., Möhle, R., Weller, M. & Wick, W. Irradiation and hypoxia promote homing of haematopoietic progenitor cells towards gliomas by TGF-beta-dependent HIF-1alpha-mediated induction of CXCL12. *Brain : a journal of neurology* **129**, 2426-2435, doi:10.1093/brain/awl173 (2006).
- 22 Du, R. *et al.* HIF1alpha induces the recruitment of bone marrow-derived vascular modulatory cells to regulate tumor angiogenesis and invasion. *Cancer cell* **13**, 206-220, doi:10.1016/j.ccr.2008.01.034 (2008).
- 23 Udani, V. *et al.* Differential expression of angiopoietin-1 and angiopoietin-2 may enhance recruitment of bone marrow-derived endothelial precursor cells into brain tumors. *Neurol Res* **27**, 801-806, doi:10.1179/016164105X49319 (2005).
- 24 Nico, B. *et al.* Intussusceptive microvascular growth in human glioma. *Clinical and Experimental Medicine* **10**, 93-98, doi:10.1007/s10238-009-0076-7 (2010).
- 25 Holash, J. *et al.* Vessel cooption, regression, and growth in tumors mediated by angiopoietins and VEGF. *Science* **284**, 1994-1998, doi:10.1126/science.284.5422.1994 (1999).
- 26 Zagzag, D. *et al.* Vascular apoptosis and involution in gliomas precede neovascularization: a novel concept for glioma growth and angiogenesis. *Lab Invest* **80**, 837-849, doi:10.1038/labinvest.3780088 (2000).
- 27 Montana, V. & Sontheimer, H. Bradykinin promotes the chemotactic invasion of primary brain tumors. *The Journal of neuroscience : the official journal of the Society for Neuroscience* **31**, 4858-4867, doi:10.1523/jneurosci.3825-10.2011 (2011).
- 28 Voutouri, C. *et al.* Experimental and computational analyses reveal dynamics of tumor vessel cooption and optimal treatment strategies. *Proc Natl Acad Sci U S A* **116**, 2662-2671, doi:10.1073/pnas.1818322116 (2019).
- 29 Zagzag, D. *et al.* Hypoxia- and vascular endothelial growth factor-induced stromal cell-derived factor-1alpha/CXCR4 expression in glioblastomas: one plausible explanation of Scherer's structures. *Am J Pathol* **173**, 545-560, doi:10.2353/ajpath.2008.071197 (2008).
- 30 Lindberg, O. R. *et al.* GBM heterogeneity as a function of variable epidermal growth factor receptor variant III activity. *Oncotarget* **7**, 79101-79116, doi:10.18632/oncotarget.12600 (2016).
- 31 Hyvönen, M. *et al.* Novel target for peptide-based imaging and treatment of brain tumors. *Mol Cancer Ther* **13**, 996-1007, doi:10.1158/1535-7163.Mct-13-0684 (2014).
- 32 Le Joncour, V. *et al.* Vulnerability of invasive glioblastoma cells to lysosomal membrane destabilization. *EMBO molecular medicine* **11**, e9034, doi:10.15252/emmm.201809034 (2019).
- 33 Griveau, A. *et al.* A Glial Signature and Wnt7 Signaling Regulate Glioma-Vascular Interactions and Tumor Microenvironment. *Cancer cell* **33**, 874-889.e877, doi:10.1016/j.ccell.2018.03.020 (2018).
- 34 Caspani, E. M., Crossley, P. H., Redondo-Garcia, C. & Martinez, S. Glioblastoma: a pathogenic crosstalk between tumor cells and pericytes. *PLoS One* **9**, e101402, doi:10.1371/journal.pone.0101402 (2014).

- 35 Yue, W.-Y. & Chen, Z.-P. Does Vasculogenic Mimicry Exist in Astrocytoma? *Journal of Histochemistry & Cytochemistry* **53**, 997-1002, doi:10.1369/jhc.4A6521.2005 (2005).
- 36 Liu, X. M. *et al.* Clinical significance of vasculogenic mimicry in human gliomas. *J Neurooncol* **105**, 173-179, doi:10.1007/s11060-011-0578-5 (2011).
- 37 Maniotis, A. J. *et al.* Vascular channel formation by human melanoma cells in vivo and in vitro: vasculogenic mimicry. *Am J Pathol* **155**, 739-752, doi:10.1016/s0002-9440(10)65173-5 (1999).
- 38 Liu, Y. *et al.* IGFBP2 promotes vasculogenic mimicry formation via regulating CD144 and MMP2 expression in glioma. *Oncogene* **38**, 1815-1831, doi:10.1038/s41388-018-0525-4 (2019).
- 39 Zhang, X., Song, Q., Wei, C. & Qu, J. LRIG1 inhibits hypoxia-induced vasculogenic mimicry formation via suppression of the EGFR/PI3K/AKT pathway and epithelial-to-mesenchymal transition in human glioma SHG-44 cells. *Cell Stress Chaperones* **20**, 631-641, doi:10.1007/s12192-015-0587-y (2015).
- 40 Liu, X. *et al.* Histone deacetylase 3 expression correlates with vasculogenic mimicry through the phosphoinositide3-kinase / ERK-MMP-laminin5 $\gamma$ 2 signaling pathway. *Cancer Sci* **106**, 857-866, doi:10.1111/cas.12684 (2015).
- 41 Pastorino, O. *et al.* Histone Deacetylase Inhibitors Impair Vasculogenic Mimicry from Glioblastoma Cells. *Cancers (Basel)* **11**, doi:10.3390/cancers11060747 (2019).
- 42 Li, X. *et al.* ZRANB2/SNHG20/FOXK1 Axis regulates Vasculogenic mimicry formation in glioma. *J Exp Clin Cancer Res* **38**, 68, doi:10.1186/s13046-019-1073-7 (2019).
- 43 Han, G. *et al.* Overexpression of leptin receptor in human glioblastoma: Correlation with vasculogenic mimicry and poor prognosis. *Oncotarget* **8**, 58163-58171, doi:10.18632/oncotarget.17344 (2017).
- 44 Ricci-Vitiani, L. *et al.* Tumour vascularization via endothelial differentiation of glioblastoma stem-like cells. *Nature* **468**, 824-828, doi:10.1038/nature09557 (2010).
- 45 Wang, R. *et al.* Glioblastoma stem-like cells give rise to tumour endothelium. *Nature* **468**, 829-833, doi:10.1038/nature09624 (2010).
- 46 Zhao, Y. *et al.* Endothelial cell transdifferentiation of human glioma stem progenitor cells in vitro. *Brain research bulletin* **82**, 308-312, doi:10.1016/j.brainresbull.2010.06.006 (2010).
- 47 Dong, J. *et al.* Glioma Stem/Progenitor Cells Contribute to Neovascularization via Transdifferentiation. *Stem Cell Reviews and Reports* **7**, 141-152, doi:10.1007/s12015-010-9169-7 (2011).
- 48 Soda, Y. *et al.* Transdifferentiation of glioblastoma cells into vascular endothelial cells. *Proc Natl Acad Sci U S A* **108**, 4274-4280, doi:10.1073/pnas.1016030108 (2011).
- 49 Cheng, L. *et al.* Glioblastoma stem cells generate vascular pericytes to support vessel function and tumor growth. *Cell* **153**, 139-152, doi:10.1016/j.cell.2013.02.021 (2013).
- 50 Guichet, P.-O. *et al.* Notch1 Stimulation Induces a Vascularization Switch With Pericyte-Like Cell Differentiation of Glioblastoma Stem Cells. *Stem Cells* **33**, 21-34, doi:10.1002/stem.1767 (2015).
- 51 Videla Richardson, G. A. *et al.* Specific Preferences in Lineage Choice and Phenotypic Plasticity of Glioma Stem Cells Under BMP4 and Noggin Influence. *Brain Pathol* **26**, 43-61, doi:https://doi.org/10.1111/bpa.12263 (2016).
- 52 Pawlikowska, L. *et al.* Polymorphisms in transforming growth factor-beta-related genes ALK1 and ENG are associated with sporadic brain arteriovenous

- malformations. *Stroke; a journal of cerebral circulation* **36**, 2278-2280, doi:10.1161/01.STR.0000182253.91167.fa (2005).
- 53 Su, H. *et al.* Reduced expression of integrin alphavbeta8 is associated with brain arteriovenous malformation pathogenesis. *Am J Pathol* **176**, 1018-1027, doi:10.2353/ajpath.2010.090453 (2010).
- 54 Ma, L. *et al.* Integrin  $\beta 8$  Deletion Enhances Vascular Dysplasia and Hemorrhage in the Brain of Adult Alk1 Heterozygous Mice. *Transl Stroke Res* **7**, 488-496, doi:10.1007/s12975-016-0478-2 (2016).
- 55 Kim, H. *et al.* Brain arteriovenous malformation biology relevant to hemorrhage and implication for therapeutic development. *Stroke; a journal of cerebral circulation* **40**, S95-97, doi:10.1161/strokeaha.108.533216 (2009).
- 56 Ayturk, U. M. *et al.* Somatic Activating Mutations in GNAQ and GNA11 Are Associated with Congenital Hemangioma. *Am J Hum Genet* **98**, 789-795, doi:10.1016/j.ajhg.2016.03.009 (2016).
- 57 Couto, J. A. *et al.* Endothelial Cells from Capillary Malformations Are Enriched for Somatic GNAQ Mutations. *Plast Reconstr Surg* **137**, 77e-82e, doi:10.1097/prs.0000000000001868 (2016).
- 58 Shirley, M. D. *et al.* Sturge-Weber syndrome and port-wine stains caused by somatic mutation in GNAQ. *N Engl J Med* **368**, 1971-1979, doi:10.1056/NEJMoa1213507 (2013).
- 59 Weinsheimer, S. *et al.* EPHB4 gene polymorphisms and risk of intracranial hemorrhage in patients with brain arteriovenous malformations. *Circ Cardiovasc Genet* **2**, 476-482, doi:10.1161/circgenetics.109.883595 (2009).
- 60 Kremer, P. H. *et al.* Susceptibility loci for sporadic brain arteriovenous malformation; a replication study and meta-analysis. *J Neurol Neurosurg Psychiatry* **87**, 693-696, doi:10.1136/jnnp-2014-310094 (2016).
- 61 Cheng, P. *et al.* Effect of elevation of vascular endothelial growth factor level on exacerbation of hemorrhage in mouse brain arteriovenous malformation. *J Neurosurg* **132**, 1566-1573, doi:10.3171/2019.1.Jns183112 (2019).
- 62 Huai, C. *et al.* Allelic variation of the MMP3 promoter affects transcription activity through the transcription factor C-MYB in human brain arteriovenous malformations. *PLoS One* **8**, e57958, doi:10.1371/journal.pone.0057958 (2013).
- 63 Sun, B. *et al.* The rs9509 polymorphism of MMP-9 is associated with risk of hemorrhage in brain arteriovenous malformations. *J Clin Neurosci* **19**, 1287-1290, doi:10.1016/j.jocn.2011.09.036 (2012).
- 64 Sturiale, C. L. *et al.* Single nucleotide polymorphisms associated with sporadic brain arteriovenous malformations: where do we stand? *Brain : a journal of neurology* **136**, 665-681, doi:10.1093/brain/aws180 (2013).
- 65 Nikolaev, S. I. *et al.* Somatic Activating KRAS Mutations in Arteriovenous Malformations of the Brain. *N Engl J Med* **378**, 250-261, doi:10.1056/NEJMoa1709449 (2018).
- 66 Priemer, D. S. *et al.* Activating KRAS mutations in arteriovenous malformations of the brain: frequency and clinicopathologic correlation. *Hum Pathol* **89**, 33-39, doi:10.1016/j.humpath.2019.04.004 (2019).
- 67 Goss, J. A. *et al.* Somatic mutations in intracranial arteriovenous malformations. *PLoS One* **14**, e0226852, doi:10.1371/journal.pone.0226852 (2019).
- 68 Gao, P. *et al.* Evidence of endothelial progenitor cells in the human brain and spinal cord arteriovenous malformations. *Neurosurgery* **67**, 1029-1035, doi:10.1227/NEU.0b013e3181ecc49e (2010).

- 69 Karlsson, T. & Cherif, H. Mutations in the ENG, ACVRL1, and SMAD4 genes and clinical manifestations of hereditary haemorrhagic telangiectasia: experience from the Center for Osler's Disease, Uppsala University Hospital. *Ups J Med Sci* **123**, 153-157, doi:10.1080/03009734.2018.1483452 (2018).
- 70 Roman, B. L. & Hinck, A. P. ALK1 signaling in development and disease: new paradigms. *Cellular and molecular life sciences : CMLS* **74**, 4539-4560, doi:10.1007/s00018-017-2636-4 (2017).
- 71 Saito, T. *et al.* Structural Basis of the Human Endoglin-BMP9 Interaction: Insights into BMP Signaling and HHT1. *Cell Rep* **19**, 1917-1928, doi:10.1016/j.celrep.2017.05.011 (2017).
- 72 Larrivee, B. *et al.* ALK1 signaling inhibits angiogenesis by cooperating with the Notch pathway. *Dev Cell* **22**, 489-500, doi:10.1016/j.devcel.2012.02.005 (2012).
- 73 Abdalla, S. A., Cymerman, U., Johnson, R. M., Deber, C. M. & Letarte, M. Disease-associated mutations in conserved residues of ALK-1 kinase domain. *European Journal of Human Genetics* **11**, 279-287, doi:10.1038/sj.ejhg.5200919 (2003).
- 74 Revencu, N. *et al.* RASA1 mutations and associated phenotypes in 68 families with capillary malformation-arteriovenous malformation. *Hum Mutat* **34**, 1632-1641, doi:10.1002/humu.22431 (2013).
- 75 Boon, L. M., Mulliken, J. B. & Vikkula, M. RASA1: variable phenotype with capillary and arteriovenous malformations. *Curr Opin Genet Dev* **15**, 265-269, doi:10.1016/j.gde.2005.03.004 (2005).



|                                                        | Signaling pathways                          | Brain/Retina/Spinal Cord Angiogenesis | Non-CNS Angiogenesis | CNS-specificity | References |
|--------------------------------------------------------|---------------------------------------------|---------------------------------------|----------------------|-----------------|------------|
| <b>Sprouting angiogenesis during brain development</b> |                                             |                                       |                      |                 |            |
| <b>Embryological brain development</b>                 | VEGF-A/B/C – VEGFR1/2/3                     | Yes                                   | Yes                  | No              | 1-4        |
|                                                        | FGF-2 – FGFR                                | Yes                                   | Yes                  | No              | 5,6        |
|                                                        | Ang1 – Tie2                                 | Yes                                   | Yes                  | No              | 7-9        |
|                                                        | Slit-2 – Robo-4                             | Yes                                   | Yes                  | No              | 10-13      |
|                                                        | Semaphorin-3A – Plexin-D1                   | Yes                                   | Yes                  | No              | 14-17      |
|                                                        | Semaphorin-3E – Plexin-D1                   | Yes                                   | Yes                  | No              | 18-20      |
|                                                        | Ephrin B2 – Eph B4                          | Yes                                   | Yes                  | No              | 21-23      |
|                                                        | Netrin-1 – Unc-5b                           | Yes                                   | Yes                  | No              | 24-26      |
|                                                        | Netrin-4 – Neogenin (recruitment of Unc-5b) | Yes                                   | Yes                  | No              | 25,27,28   |
|                                                        | Integrin $\alpha_v\beta_8$ – TGF $\beta$ R1 | Yes                                   | Yes                  | No              | 29-32      |
|                                                        | Wnt7 – Fzd/Gpr124/Reck                      | Yes (brain)                           | No                   | Yes             | 33-39      |
|                                                        | Norrin – Fzd4/Lrp5/Tspan12                  | Yes (retina)                          | No                   | Yes             | 40-42      |
|                                                        | Netrin-1/Unc5B – Wnt7a/b/Lrp5               | Yes                                   | No                   | Yes             | 43         |
|                                                        | UL – DR6/TROY                               | Yes                                   | No                   | Yes             | 44         |
|                                                        | PPIL4 – JMJD6/Wnt                           | Yes                                   | No                   | Yes             | 45         |
| <b>Postnatal brain development</b>                     | VEGF-A/B/C – VEGFR1/2/3                     | Yes                                   | Yes                  | No              | 1,2        |
|                                                        | FGF-2 – FGFR                                | Yes                                   | Yes                  | No              | 5,6        |
|                                                        | Ang1 – Tie2                                 | Yes                                   | Yes                  | No              | 46         |
|                                                        | Nogo-A-S1PR2?                               | Yes                                   | ?                    | ?               | 47,48      |
|                                                        | Nogo-B-NgBR                                 | ?                                     | Yes                  | No              | 49-51      |
|                                                        | Semaphorin-3A – Nrp1/Plexin-D1              | Yes                                   | ?                    | ?               | 14,52,53   |
|                                                        | Semaphorin-3E – Plexin-D1                   | Yes                                   | ?                    | ?               | 18,20      |
|                                                        | Slit-2 – Robo-4                             | Yes                                   | Yes                  | No              | 10         |
|                                                        | Ephrin B2 – Eph B4                          | Yes                                   | Yes                  | No              | 21-23      |
|                                                        | Netrin-1 – Unc-5b                           | Yes                                   | Yes                  | No              | 24         |
|                                                        | UL – DR6/TROY                               | Yes                                   | No                   | Yes             | 44         |
|                                                        | Norrin – Fzd4/Lrp5/Tspan12                  | Yes                                   | No                   | Yes             | 40-42      |

| Sprouting angiogenesis in glial brain tumors                |                                               |     |     |    |       |
|-------------------------------------------------------------|-----------------------------------------------|-----|-----|----|-------|
| <b>Glial brain tumors</b>                                   | VEGF-A – VEGFR                                | Yes | Yes | No | 54,55 |
|                                                             | FGF-1/2 – FGFR                                | Yes | Yes | No | 56,57 |
|                                                             | Dll4 – Notch                                  | Yes | Yes | No | 58-60 |
|                                                             | Jagged-1 – Notch                              | Yes | Yes | No | 59,60 |
|                                                             | PDGF-PDGFR                                    | Yes | Yes | No | 61    |
|                                                             | EGFL7– Notch                                  | Yes | Yes | No | 62    |
|                                                             | Ang-2 – Tie-1/2                               | Yes | Yes | No | 63-65 |
|                                                             | Slit-2 – Robo-4                               | Yes | Yes | No | 66    |
|                                                             | Ephrin B2 – EphB4                             | Yes | Yes | No | 22,67 |
|                                                             | Netrin-1– UNC-5b                              | Yes | ?   | ?  | 68-70 |
|                                                             | Sema3 – Plexin                                | Yes | Yes | No | 71-73 |
|                                                             | Integrin $\alpha_v\beta_8$ – TGF $\beta$ R1   | Yes | Yes | No | 74    |
|                                                             | Integrin $\alpha_v\beta_3$ – TGF $\beta$ R1   | Yes | Yes | No | 75,76 |
|                                                             | Integrin $\alpha_v\beta_5$ – TGF $\beta$ R1   | Yes | Yes | No | 76    |
|                                                             | Integrin $\alpha_5\beta_1$ – TGF $\beta$ R1   | Yes | Yes | No | 77    |
|                                                             | Integrin $\alpha_7\beta_1$ – TGF $\beta$ R1   | Yes | Yes | No | 78    |
|                                                             | Integrin $\alpha_5\beta_1$ – EGFL7            | Yes | Yes | No | 77,79 |
|                                                             | CXCR4 – CXCL12/SDF1 $\alpha$                  | Yes | Yes | No | 80    |
|                                                             | Wnt1 (anti-angiogenic) & Dkk1 (Wnt inhibitor) | Yes | Yes | No | 81    |
| Sprouting angiogenesis in brain arteriovenous malformations |                                               |     |     |    |       |
| <b>Hereditary brain AVMs</b>                                | Endoglin – TGF $\beta$ R                      | Yes | Yes | No | 82    |
|                                                             | TGF $\beta$ – ALK1                            | Yes | Yes | No | 83    |
|                                                             | RASA1 – EPHB4                                 | Yes | Yes | No | 84-86 |
| <b>Sporadic brain AVMs</b>                                  | VEGF-A                                        | Yes | Yes | No | 87    |
|                                                             | TGF $\beta$ – ALK1 (ACVRL1)                   | Yes | Yes | No | 88-90 |
|                                                             | Endoglin – TGF $\beta$ R                      | Yes | Yes | No | 88    |
|                                                             | GNAQ                                          | Yes | Yes | No | 91    |
|                                                             | Ephrin B2 – EphB4                             | Yes | Yes | No | 92    |
|                                                             | K-RAS                                         | Yes | Yes | No | 93-95 |
|                                                             | IL1B – IL1R                                   | Yes | Yes | No | 83    |
|                                                             | IL6                                           | Yes | Yes | No | 96    |
|                                                             | Integrin $\alpha_v\beta_8$ – TGF $\beta$ R    | Yes | Yes | No | 97    |

|  |                           |     |     |    |         |
|--|---------------------------|-----|-----|----|---------|
|  | ANGPTL4                   | Yes | Yes | No | 98,99   |
|  | Wnt7 –<br>Fzd/Gpr124/Reck | Yes | Yes | No | 100     |
|  | MMP3                      | Yes | Yes | No | 101     |
|  | MMP9                      | Yes | Yes | No | 102     |
|  | CDKN2a/b<br>(ANRIL)       | Yes | Yes | No | 103,104 |
|  | Sox17                     | Yes | Yes | No | 105     |
|  | RBBP8                     | Yes | Yes | No | 105     |

Table 2. General and CNS-specific molecular mechanisms of angiogenesis during brain development, in glial brain tumors, and in brain AVMs.

## REFERENCES

- 1 Carmeliet, P. *et al.* Abnormal blood vessel development and lethality in embryos lacking a single VEGF allele. *Nature* **380**, 435-439, doi:10.1038/380435a0 (1996).
- 2 Ferrara, N. *et al.* Heterozygous embryonic lethality induced by targeted inactivation of the VEGF gene. *Nature* **380**, 439-442, doi:10.1038/380439a0 (1996).
- 3 Wild, R. *et al.* Neuronal sFlt1 and Vegfaa determine venous sprouting and spinal cord vascularization. *Nat Commun* **8**, 13991, doi:10.1038/ncomms13991 (2017).
- 4 Matsuoka, R. L. *et al.* Radial glia regulate vascular patterning around the developing spinal cord. *Elife* **5**, doi:10.7554/eLife.20253 (2016).
- 5 Jih, Y. J. *et al.* Distinct regulation of genes by bFGF and VEGF-A in endothelial cells. *Angiogenesis* **4**, 313-321, doi:10.1023/a:1016080321956 (2001).
- 6 Seghezzi, G. *et al.* Fibroblast growth factor-2 (FGF-2) induces vascular endothelial growth factor (VEGF) expression in the endothelial cells of forming capillaries: an autocrine mechanism contributing to angiogenesis. *J Cell Biol* **141**, 1659-1673, doi:10.1083/jcb.141.7.1659 (1998).
- 7 Suri, C. *et al.* Requisite role of angiopoietin-1, a ligand for the TIE2 receptor, during embryonic angiogenesis. *Cell* **87**, 1171-1180, doi:10.1016/s0092-8674(00)81813-9 (1996).
- 8 Hackett, S. F., Wiegand, S., Yancopoulos, G. & Campochiaro, P. A. Angiopoietin-2 plays an important role in retinal angiogenesis. *J Cell Physiol* **192**, 182-187, doi:https://doi.org/10.1002/jcp.10128 (2002).
- 9 Sato, T. N. *et al.* Distinct roles of the receptor tyrosine kinases Tie-1 and Tie-2 in blood vessel formation. *Nature* **376**, 70-74, doi:10.1038/376070a0 (1995).
- 10 Jones, C. A. *et al.* Robo4 stabilizes the vascular network by inhibiting pathologic angiogenesis and endothelial hyperpermeability. *Nat Med* **14**, 448-453, doi:10.1038/nm1742 (2008).
- 11 Jones, C. A. *et al.* Slit2-Robo4 signalling promotes vascular stability by blocking Arf6 activity. *Nat Cell Biol* **11**, 1325-1331, doi:10.1038/ncb1976 (2009).
- 12 Bedell, V. M. *et al.* [roundabout4](#) is essential for angiogenesis [in vivo](#). *Proc Natl Acad Sci U S A* **102**, 6373, doi:10.1073/pnas.0408318102 (2005).
- 13 Rama, N. *et al.* Slit2 signaling through Robo1 and Robo2 is required for retinal neovascularization. *Nat Med* **21**, 483-491, doi:10.1038/nm.3849 (2015).
- 14 Serini, G. *et al.* Class 3 semaphorins control vascular morphogenesis by inhibiting integrin function. *Nature* **424**, 391-397, doi:10.1038/nature01784 (2003).
- 15 Acevedo, L. M., Barillas, S., Weis, S. M., Gothert, J. R. & Cheresh, D. A. Semaphorin 3A suppresses VEGF-mediated angiogenesis yet acts as a vascular permeability factor. *Blood* **111**, 2674-2680, doi:10.1182/blood-2007-08-110205 (2008).
- 16 Duh, E. J. Sema 3A resists retinal revascularization. *Blood* **117**, 5785-5786, doi:10.1182/blood-2011-03-343228 (2011).
- 17 Vieira, J. M., Schwarz, Q. & Ruhrberg, C. Role of the neuropilin ligands VEGF164 and SEMA3A in neuronal and vascular patterning in the mouse. *Novartis Found Symp* **283**, 230-235; discussion 235-241 (2007).
- 18 Fukushima, Y. *et al.* Sema3E-PlexinD1 signaling selectively suppresses disoriented angiogenesis in ischemic retinopathy in mice. *J Clin Invest* **121**, 1974-1985, doi:10.1172/JCI44900 (2011).

- 19 Gu, C. *et al.* Semaphorin 3E and plexin-D1 control vascular pattern independently of neuropilins. *Science* **307**, 265-268, doi:10.1126/science.1105416 (2005).
- 20 Kim, J., Oh, W. J., Gaiano, N., Yoshida, Y. & Gu, C. Semaphorin 3E-Plexin-D1 signaling regulates VEGF function in developmental angiogenesis via a feedback mechanism. *Genes Dev* **25**, 1399-1411, doi:10.1101/gad.2042011 (2011).
- 21 Gerety, S. S., Wang, H. U., Chen, Z. F. & Anderson, D. J. Symmetrical mutant phenotypes of the receptor EphB4 and its specific transmembrane ligand ephrin-B2 in cardiovascular development. *Molecular cell* **4**, 403-414 (1999).
- 22 Sawamiphak, S. *et al.* Ephrin-B2 regulates VEGFR2 function in developmental and tumour angiogenesis. *Nature* **465**, 487-491, doi:10.1038/nature08995 (2010).
- 23 Wang, H. U., Chen, Z. F. & Anderson, D. J. Molecular distinction and angiogenic interaction between embryonic arteries and veins revealed by ephrin-B2 and its receptor Eph-B4. *Cell* **93**, 741-753 (1998).
- 24 Larrivee, B. *et al.* Activation of the UNC5B receptor by Netrin-1 inhibits sprouting angiogenesis. *Genes Dev* **21**, 2433-2447, doi:10.1101/gad.437807 (2007).
- 25 Lejmi, E. *et al.* Netrin-4 inhibits angiogenesis via binding to neogenin and recruitment of Unc5B. *Proc Natl Acad Sci U S A* **105**, 12491-12496, doi:10.1073/pnas.0804008105 (2008).
- 26 Lu, X. *et al.* The netrin receptor UNC5B mediates guidance events controlling morphogenesis of the vascular system. *Nature* **432**, 179-186, doi:10.1038/nature03080 (2004).
- 27 Wilson, B. D. *et al.* Netrins promote developmental and therapeutic angiogenesis. *Science* **313**, 640-644, doi:10.1126/science.1124704 (2006).
- 28 Yin, Y., Sanes, J. R. & Miner, J. H. Identification and expression of mouse netrin-4. *Mech Dev* **96**, 115-119 (2000).
- 29 McCarty, J. H. *et al.* Selective ablation of alphav integrins in the central nervous system leads to cerebral hemorrhage, seizures, axonal degeneration and premature death. *Development* **132**, 165-176, doi:10.1242/dev.01551 (2005).
- 30 Proctor, J. M., Zang, K., Wang, D., Wang, R. & Reichardt, L. F. Vascular development of the brain requires beta8 integrin expression in the neuroepithelium. *The Journal of neuroscience : the official journal of the Society for Neuroscience* **25**, 9940-9948, doi:10.1523/JNEUROSCI.3467-05.2005 (2005).
- 31 Arnold, T. D. *et al.* Excessive vascular sprouting underlies cerebral hemorrhage in mice lacking  $\alpha V\beta 8$ -TGF $\beta$  signaling in the brain. *Development* **141**, 4489-4499, doi:10.1242/dev.107193 (2014).
- 32 Hirota, S. *et al.* Neuropilin 1 balances  $\beta 8$  integrin-activated TGF $\beta$  signaling to control sprouting angiogenesis in the brain. *Development* **142**, 4363-4373, doi:10.1242/dev.113746 (2015).
- 33 Daneman, R. *et al.* Wnt/beta-catenin signaling is required for CNS, but not non-CNS, angiogenesis. *Proc Natl Acad Sci U S A* **106**, 641-646, doi:10.1073/pnas.0805165106 (2009).
- 34 Stenman, J. M. *et al.* Canonical Wnt signaling regulates organ-specific assembly and differentiation of CNS vasculature. *Science* **322**, 1247-1250, doi:10.1126/science.1164594 (2008).
- 35 Anderson, K. D. *et al.* Angiogenic sprouting into neural tissue requires Gpr124, an orphan G protein-coupled receptor. *Proc Natl Acad Sci U S A* **108**, 2807-2812, doi:10.1073/pnas.1019761108 (2011).
- 36 Cullen, M. *et al.* GPR124, an orphan G protein-coupled receptor, is required for CNS-specific vascularization and establishment of the blood-brain barrier. *Proc Natl Acad Sci U S A* **108**, 5759-5764, doi:10.1073/pnas.1017192108 (2011).

- 37 Kuhnert, F. *et al.* Essential regulation of CNS angiogenesis by the orphan G protein-coupled receptor GPR124. *Science* **330**, 985-989, doi:10.1126/science.1196554 (2010).
- 38 Wang, Y., Cho, S. G., Wu, X., Siwko, S. & Liu, M. G-protein coupled receptor 124 (GPR124) in endothelial cells regulates vascular endothelial growth factor (VEGF)-induced tumor angiogenesis. *Curr Mol Med* **14**, 543-554, doi:10.2174/1566524014666140414205943 (2014).
- 39 Vanhollebeke, B. *et al.* Tip cell-specific requirement for an atypical Gpr124- and Reck-dependent Wnt/ $\beta$ -catenin pathway during brain angiogenesis. *Elife* **4**, doi:10.7554/eLife.06489 (2015).
- 40 Wang, Y. *et al.* Norrin/Frizzled4 signaling in retinal vascular development and blood brain barrier plasticity. *Cell* **151**, 1332-1344, doi:10.1016/j.cell.2012.10.042 (2012).
- 41 Ye, X. *et al.* Norrin, frizzled-4, and Lrp5 signaling in endothelial cells controls a genetic program for retinal vascularization. *Cell* **139**, 285-298, doi:10.1016/j.cell.2009.07.047 (2009).
- 42 Ye, X., Wang, Y. & Nathans, J. The Norrin/Frizzled4 signaling pathway in retinal vascular development and disease. *Trends Mol Med* **16**, 417-425, doi:10.1016/j.molmed.2010.07.003 (2010).
- 43 Boyé, K. *et al.* Endothelial Unc5B controls blood-brain barrier integrity. *Nature Communications* **13**, 1169, doi:10.1038/s41467-022-28785-9 (2022).
- 44 Tam, S. J. *et al.* Death receptors DR6 and TROY regulate brain vascular development. *Dev Cell* **22**, 403-417, doi:10.1016/j.devcel.2011.11.018 (2012).
- 45 Barak, T. *et al.* PPIL4 is essential for brain angiogenesis and implicated in intracranial aneurysms in humans. *Nat Med* **27**, 2165-2175, doi:10.1038/s41591-021-01572-7 (2021).
- 46 Teichert, M. *et al.* Pericyte-expressed Tie2 controls angiogenesis and vessel maturation. *Nat Commun* **8**, 16106, doi:10.1038/ncomms16106 (2017).
- 47 Walchli, T. *et al.* Quantitative assessment of angiogenesis, perfused blood vessels and endothelial tip cells in the postnatal mouse brain. *Nature protocols* **10**, 53-74, doi:10.1038/nprot.2015.002 (2015).
- 48 Walchli, T. *et al.* Nogo-A is a negative regulator of CNS angiogenesis. *Proc Natl Acad Sci U S A* **110**, E1943-1952, doi:10.1073/pnas.1216203110 (2013).
- 49 Acevedo, L. *et al.* A new role for Nogo as a regulator of vascular remodeling. *Nat Med* **10**, 382-388, doi:10.1038/nm1020 (2004).
- 50 Dodd, D. A. *et al.* Nogo-A, -B, and -C are found on the cell surface and interact together in many different cell types. *J Biol Chem* **280**, 12494-12502, doi:10.1074/jbc.M411827200 (2005).
- 51 Zhao, B. *et al.* Nogo-B receptor is essential for angiogenesis in zebrafish via Akt pathway. *Blood* **116**, 5423-5433, doi:10.1182/blood-2010-02-271577 (2010).
- 52 Torres-Vazquez, J. *et al.* Semaphorin-plexin signaling guides patterning of the developing vasculature. *Dev Cell* **7**, 117-123, doi:10.1016/j.devcel.2004.06.008 (2004).
- 53 Zygmunt, T. *et al.* Semaphorin-PlexinD1 signaling limits angiogenic potential via the VEGF decoy receptor sFlt1. *Dev Cell* **21**, 301-314, doi:10.1016/j.devcel.2011.06.033 (2011).
- 54 Carmeliet, P. Angiogenesis in life, disease and medicine. *Nature* **438**, 932-936, doi:10.1038/nature04478 (2005).
- 55 Kaur, B. *et al.* Hypoxia and the hypoxia-inducible-factor pathway in glioma growth and angiogenesis. *Neuro Oncol* **7**, 134-153, doi:10.1215/s1152851704001115 (2005).

- 56 Takahashi, J. A. *et al.* Correlation of basic fibroblast growth factor expression levels with the degree of malignancy and vascularity in human gliomas. *J Neurosurg* **76**, 792-798, doi:10.3171/jns.1992.76.5.0792 (1992).
- 57 Jimenez-Pascual, A., Mitchell, K., Siebzehrubl, F. A. & Lathia, J. D. FGF2: a novel druggable target for glioblastoma? *Expert Opin Ther Targets* **24**, 311-318, doi:10.1080/14728222.2020.1736558 (2020).
- 58 Hellstrom, M., Phng, L. K. & Gerhardt, H. VEGF and Notch signaling: the yin and yang of angiogenic sprouting. *Cell Adh Migr* **1**, 133-136 (2007).
- 59 Jubb, A. M. *et al.* Expression of vascular Notch ligands Delta-like 4 and Jagged-1 in glioblastoma. *Histopathology* **60**, 740-747, doi:10.1111/j.1365-2559.2011.04138.x (2012).
- 60 Oon, C. E. *et al.* Role of Delta-like 4 in Jagged1-induced tumour angiogenesis and tumour growth. *Oncotarget* **8**, 40115-40131, doi:10.18632/oncotarget.16969 (2017).
- 61 Guo, P. *et al.* Platelet-derived growth factor-B enhances glioma angiogenesis by stimulating vascular endothelial growth factor expression in tumor endothelia and by promoting pericyte recruitment. *Am J Pathol* **162**, 1083-1093, doi:10.1016/s0002-9440(10)63905-3 (2003).
- 62 Huang, C. H. *et al.* Expression and clinical significance of EGFL7 in malignant glioma. *J Cancer Res Clin Oncol* **136**, 1737-1743, doi:10.1007/s00432-010-0832-9 (2010).
- 63 Audero, E. *et al.* Expression of angiopoietin-1 in human glioblastomas regulates tumor-induced angiogenesis: in vivo and in vitro studies. *Arterioscler Thromb Vasc Biol* **21**, 536-541, doi:10.1161/01.atv.21.4.536 (2001).
- 64 Labussière, M. *et al.* Angiopoietin-2 May Be Involved in the Resistance to Bevacizumab in Recurrent Glioblastoma. *Cancer Invest* **34**, 39-44, doi:10.3109/07357907.2015.1088948 (2016).
- 65 Peterson, T. E. *et al.* Dual inhibition of Ang-2 and VEGF receptors normalizes tumor vasculature and prolongs survival in glioblastoma by altering macrophages. *Proceedings of the National Academy of Sciences* **113**, 4470, doi:10.1073/pnas.1525349113 (2016).
- 66 Koo, S., Martin, G. & Toussaint, L. G. MicroRNA-145 Promotes the Phenotype of Human Glioblastoma Cells Selected for Invasion. *Anticancer Res* **35**, 3209-3215 (2015).
- 67 Erber, R. *et al.* EphB4 controls blood vascular morphogenesis during postnatal angiogenesis. *The EMBO journal* **25**, 628-641, doi:10.1038/sj.emboj.7600949 (2006).
- 68 Castets, M. & Mehlen, P. Netrin-1 role in angiogenesis: to be or not to be a pro-angiogenic factor? *Cell Cycle* **9**, 1466-1471 (2010).
- 69 Sanvoranart, T. *et al.* Targeting Netrin-1 in glioblastoma stem-like cells inhibits growth, invasion, and angiogenesis. *Tumour Biol* **37**, 14949-14960, doi:10.1007/s13277-016-5314-5 (2016).
- 70 Shimizu, A. *et al.* Netrin-1 promotes glioblastoma cell invasiveness and angiogenesis by multiple pathways including activation of RhoA, cathepsin B, and cAMP-response element-binding protein. *J Biol Chem* **288**, 2210-2222, doi:10.1074/jbc.M112.397398 (2013).
- 71 Bagci, T., Wu, J. K., Pfannl, R., Ilag, L. L. & Jay, D. G. Autocrine semaphorin 3A signaling promotes glioblastoma dispersal. *Oncogene* **28**, 3537-3550, doi:10.1038/onc.2009.204 (2009).
- 72 Higgins, D. M. O. *et al.* Semaphorin 3A mediated brain tumor stem cell proliferation and invasion in EGFRviii mutant gliomas. *BMC Cancer* **20**, 1213, doi:10.1186/s12885-020-07694-4 (2020).

- 73 Lee, J. *et al.* Anti-SEMA3A Antibody: A Novel Therapeutic Agent to Suppress Glioblastoma Tumor Growth. *Cancer Res Treat* **50**, 1009-1022, doi:10.4143/crt.2017.315 (2018).
- 74 Tchaicha, J. H. *et al.* Glioblastoma angiogenesis and tumor cell invasiveness are differentially regulated by  $\beta 8$  integrin. *Cancer Res* **71**, 6371-6381, doi:10.1158/0008-5472.Can-11-0991 (2011).
- 75 Gladson, C. L. & Cheresh, D. A. Glioblastoma expression of vitronectin and the alpha v beta 3 integrin. Adhesion mechanism for transformed glial cells. *J Clin Invest* **88**, 1924-1932, doi:10.1172/jci115516 (1991).
- 76 Bello, L. *et al.* Alpha(v)beta3 and alpha(v)beta5 integrin expression in glioma periphery. *Neurosurgery* **49**, 380-389; discussion 390, doi:10.1097/00006123-200108000-00022 (2001).
- 77 Dudvarski Stanković, N. *et al.* EGFL7 enhances surface expression of integrin  $\alpha(5)\beta(1)$  to promote angiogenesis in malignant brain tumors. *EMBO Mol Med* **10**, doi:10.15252/emmm.201708420 (2018).
- 78 Haas, T. L. *et al.* Integrin alpha7 Is a Functional Marker and Potential Therapeutic Target in Glioblastoma. *Cell stem cell* **21**, 35-50.e39, doi:10.1016/j.stem.2017.04.009 (2017).
- 79 Nikolić, I. *et al.* EGFL7 ligates  $\alpha v \beta 3$  integrin to enhance vessel formation. *Blood* **121**, 3041-3050, doi:https://doi.org/10.1182/blood-2011-11-394882 (2013).
- 80 Zagzag, D. *et al.* Hypoxia-inducible factor 1 and VEGF upregulate CXCR4 in glioblastoma: implications for angiogenesis and glioma cell invasion. *Lab Invest* **86**, 1221-1232, doi:10.1038/labinvest.3700482 (2006).
- 81 Reis, M. *et al.* Endothelial Wnt/ $\beta$ -catenin signaling inhibits glioma angiogenesis and normalizes tumor blood vessels by inducing PDGF-B expression. *J Exp Med* **209**, 1611-1627, doi:10.1084/jem.20111580 (2012).
- 82 McAllister, K. A. *et al.* Endoglin, a TGF-beta binding protein of endothelial cells, is the gene for hereditary haemorrhagic telangiectasia type 1. *Nature genetics* **8**, 345-351, doi:10.1038/ng1294-345 (1994).
- 83 Kim, H. *et al.* Brain arteriovenous malformation biology relevant to hemorrhage and implication for therapeutic development. *Stroke; a journal of cerebral circulation* **40**, S95-97, doi:10.1161/strokeaha.108.533216 (2009).
- 84 Boon, L. M., Mulliken, J. B. & Viskula, M. RASA1: variable phenotype with capillary and arteriovenous malformations. *Curr Opin Genet Dev* **15**, 265-269, doi:10.1016/j.gde.2005.03.004 (2005).
- 85 Moteki, Y., Akagawa, H., Niimi, Y., Okada, Y. & Kawamata, T. Novel RASA1 mutations in Japanese pedigrees with capillary malformation-arteriovenous malformation. *Brain Dev*, doi:10.1016/j.braindev.2019.06.003 (2019).
- 86 Revencu, N. *et al.* RASA1 mutations and associated phenotypes in 68 families with capillary malformation-arteriovenous malformation. *Hum Mutat* **34**, 1632-1641, doi:10.1002/humu.22431 (2013).
- 87 Cheng, P. *et al.* Effect of elevation of vascular endothelial growth factor level on exacerbation of hemorrhage in mouse brain arteriovenous malformation. *J Neurosurg* **132**, 1566-1573, doi:10.3171/2019.1.Jns183112 (2019).
- 88 Pawlikowska, L. *et al.* Polymorphisms in transforming growth factor-beta-related genes ALK1 and ENG are associated with sporadic brain arteriovenous malformations. *Stroke; a journal of cerebral circulation* **36**, 2278-2280, doi:10.1161/01.STR.0000182253.91167.fa (2005).



- 89 Simon, M. *et al.* Association of a polymorphism of the ACVRL1 gene with sporadic arteriovenous malformations of the central nervous system. *J Neurosurg* **104**, 945-949, doi:10.3171/jns.2006.104.6.945 (2006).
- 90 Hao, Q. *et al.* Activin Receptor-Like Kinase 1 Combined With VEGF-A Affects Migration and Proliferation of Endothelial Cells From Sporadic Human Cerebral AVMs. *Front Cell Neurosci* **12**, 525, doi:10.3389/fncel.2018.00525 (2018).
- 91 Shirley, M. D. *et al.* Sturge-Weber syndrome and port-wine stains caused by somatic mutation in GNAQ. *N Engl J Med* **368**, 1971-1979, doi:10.1056/NEJMoa1213507 (2013).
- 92 Weinsheimer, S. *et al.* EPHB4 gene polymorphisms and risk of intracranial hemorrhage in patients with brain arteriovenous malformations. *Circ Cardiovasc Genet* **2**, 476-482, doi:10.1161/circgenetics.109.883595 (2009).
- 93 Goss, J. A. *et al.* Somatic mutations in intracranial arteriovenous malformations. *PLoS One* **14**, e0226852, doi:10.1371/journal.pone.0226852 (2019).
- 94 Nikolaev, S. I. *et al.* Somatic Activating KRAS Mutations in Arteriovenous Malformations of the Brain. *N Engl J Med* **378**, 250-261, doi:10.1056/NEJMoa1709449 (2018).
- 95 Priemer, D. S. *et al.* Activating KRAS mutations in arteriovenous malformations of the brain: frequency and clinicopathologic correlation. *Hum Pathol* **89**, 33-39, doi:10.1016/j.humpath.2019.04.004 (2019).
- 96 Chen, Y. *et al.* Interleukin-6 involvement in brain arteriovenous malformations. *Ann Neurol* **59**, 72-80, doi:10.1002/ana.20697 (2006).
- 97 Su, H. *et al.* Reduced expression of integrin alphavbeta8 is associated with brain arteriovenous malformation pathogenesis. *Am J Pathol* **176**, 1018-1027, doi:10.2353/ajpath.2010.090453 (2010).
- 98 Kremer, P. H. *et al.* Susceptibility loci for sporadic brain arteriovenous malformation; a replication study and meta-analysis. *J Neurol Neurosurg Psychiatry* **87**, 693-696, doi:10.1136/jnnp-2014-310094 (2016).
- 99 Mikhak, B. *et al.* Angiopoietin-like 4 (ANGPTL4) gene polymorphisms and risk of brain arteriovenous malformations. *Cerebrovascular diseases (Basel, Switzerland)* **31**, 338-345, doi:10.1159/000322601 (2011).
- 100 Weinsheimer, S. *et al.* G Protein-Coupled Receptor 124 (GPR124) Gene Polymorphisms and Risk of Brain Arteriovenous Malformation. *Translational stroke research* **3**, 418-427, doi:10.1007/s12975-012-0202-9 (2012).
- 101 Huai, C. *et al.* Allelic variation of the MMP3 promoter affects transcription activity through the transcription factor C-MYB in human brain arteriovenous malformations. *PLoS One* **8**, e57958, doi:10.1371/journal.pone.0057958 (2013).
- 102 Sun, B. *et al.* The rs9509 polymorphism of MMP-9 is associated with risk of hemorrhage in brain arteriovenous malformations. *J Clin Neurosci* **19**, 1287-1290, doi:10.1016/j.jocn.2011.09.036 (2012).
- 103 Sturiale, C. L. *et al.* Association between polymorphisms rs1333040 and rs7865618 of chromosome 9p21 and sporadic brain arteriovenous malformations. *Cerebrovasc Dis* **37**, 290-295, doi:10.1159/000360752 (2014).
- 104 Bendjilali, N. *et al.* Common variants on 9p21.3 are associated with brain arteriovenous malformations with accompanying arterial aneurysms. *J Neurol Neurosurg Psychiatry* **85**, 1280-1283, doi:10.1136/jnnp-2013-306461 (2014).
- 105 Kremer, P. H. *et al.* Evaluation of genetic risk loci for intracranial aneurysms in sporadic arteriovenous malformations of the brain. *J Neurol Neurosurg Psychiatry* **86**, 524-529, doi:10.1136/jnnp-2013-307276 (2015).
